# Supplementary material
Source: PubMed Central journal article supplement (PMC8099955)
Supplement: 12264_2020_625_MOESM1_ESM.pdf [file 12264_2020_625_MOESM1_ESM.pdf]

## Supplementary Material

Effects of Amiloride and APETx2 microinjections outside the LC on sleep wake architecture

[A] Total percent amount of wakefulness

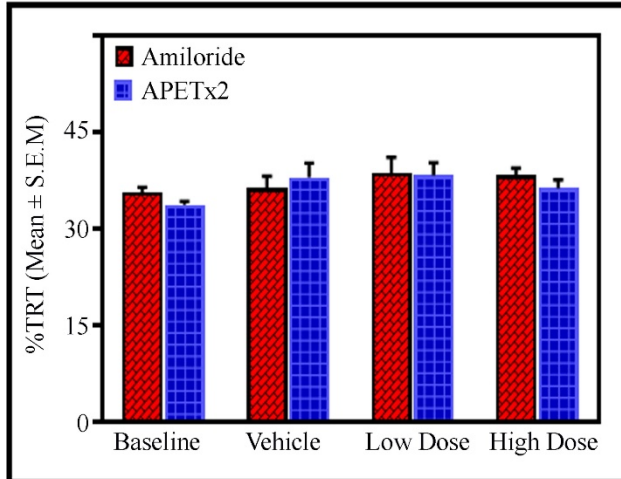

[B] Total percent amount of NREM sleep

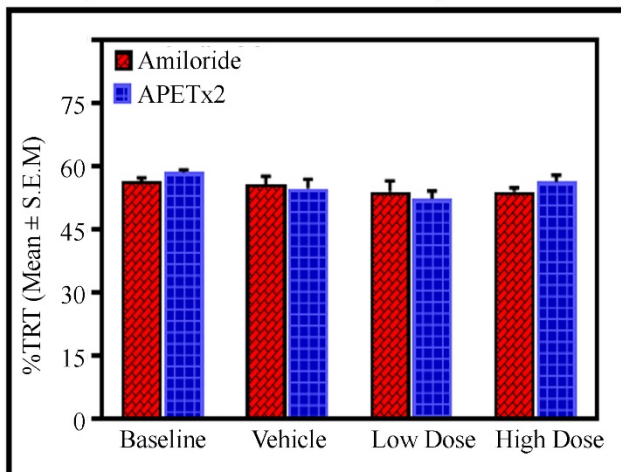

[c] Total percent amount of REM sleep

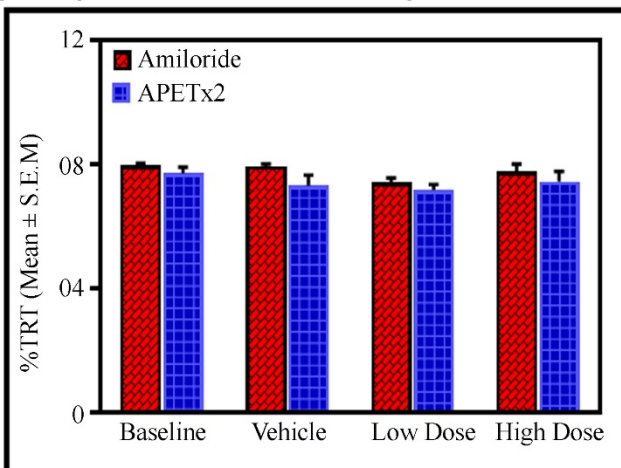

Supplementary Fig 1

**Fig. 1** Effects of amiloride and APETx2 microinjections outside the LC on sleep-wake architecture. The sites of Amiloride and APETx2 microinjections in three rats are located outside the LC. In these rats, the amount of wakefulness (A), NREM sleep (B), and REM sleep (C) in the baseline, vehicle, low and high doses of amiloride and APETx2 microinjected groups are comparable.
